# Supplementary material for: Feasibility of collecting and assessing patient-reported outcomes for emergency admissions: laparotomy for gastrointestinal conditions
Source: PubMed Central journal article supplement (PMC6203065; doi:10.1136/bmjgast-2018-000238), 2018-10-16

## **Appendices**

### **Appendix 1: GIQLI Questionnaire [23]**

1. Over the past 2 weeks, how often have you had abdominal pains?

|               |                   |               |         |       |
|---------------|-------------------|---------------|---------|-------|
| all the time, | most of the time, | now and then, | rarely, | never |
| ( 0 )         | ( 1 )             | ( 2 )         | ( 3 )   | ( 4 ) |

2. Over the past 2 weeks, how often have you been bothered by a feeling of fullness in the upper abdomen?

|               |                   |               |         |       |
|---------------|-------------------|---------------|---------|-------|
| all the time, | most of the time, | now and then, | rarely, | never |
| ( 0 )         | ( 1 )             | ( 2 )         | ( 3 )   | ( 4 ) |

3. Over the past 2 weeks, how often have you felt bothered by bloating or the sensation of having too much gas in the abdomen?

|               |                   |               |         |       |
|---------------|-------------------|---------------|---------|-------|
| all the time, | most of the time, | now and then, | rarely, | never |
| ( 0 )         | ( 1 )             | ( 2 )         | ( 3 )   | ( 4 ) |

4. Over the past 2 weeks, how often have you felt bothered by passing wind?

|               |                   |               |         |       |
|---------------|-------------------|---------------|---------|-------|
| all the time, | most of the time, | now and then, | rarely, | never |
| ( 0 )         | ( 1 )             | ( 2 )         | ( 3 )   | ( 4 ) |

5. Over the past 2 weeks, how often have you felt bothered by burping or belching?

|               |                      |                  |         |       |
|---------------|----------------------|------------------|---------|-------|
| all the time, | most of the<br>time, | now and<br>then, | rarely, | never |
| ( 0 )         | ( 1 )                | ( 2 )            | ( 3 )   | ( 4 ) |

6. Over the past 2 weeks, how often have you noticed unusual stomach or bowel noises?

|               |                      |                  |         |       |
|---------------|----------------------|------------------|---------|-------|
| all the time, | most of the<br>time, | now and<br>then, | rarely, | never |
| ( 0 )         | ( 1 )                | ( 2 )            | ( 3 )   | ( 4 ) |

7. Over the past 2 weeks, how often have you been bothered by frequent bowel movements?

|               |                      |                  |         |       |
|---------------|----------------------|------------------|---------|-------|
| all the time, | most of the<br>time, | now and<br>then, | rarely, | never |
| ( 0 )         | ( 1 )                | ( 2 )            | ( 3 )   | ( 4 ) |

8. Over the past 2 weeks, how often have you really enjoyed eating?

|               |                      |                  |         |       |
|---------------|----------------------|------------------|---------|-------|
| all the time, | most of the<br>time, | now and<br>then, | rarely, | never |
| ( 4 )         | ( 3 )                | ( 2 )            | ( 1 )   | ( 0 ) |

9. How often have you had to refrain from eating the food you love due to your illness?

|               |                   |               |         |       |
|---------------|-------------------|---------------|---------|-------|
| all the time, | most of the time, | now and then, | rarely, | never |
| ( 0 )         | ( 1 )             | ( 2 )         | ( 3 )   | ( 4 ) |

10. Over the past 2 weeks, how did you manage to cope with everyday stress?

|             |        |             |       |           |
|-------------|--------|-------------|-------|-----------|
| very badly, | badly, | moderately, | well, | very well |
| ( 0 )       | ( 1 )  | ( 2 )       | ( 3 ) | ( 4 )     |

11. Over the past 2 weeks, how often have you felt sad about the fact that you are sick?

|               |                   |               |         |       |
|---------------|-------------------|---------------|---------|-------|
| all the time, | most of the time, | now and then, | rarely, | never |
| ( 0 )         | ( 1 )             | ( 2 )         | ( 3 )   | ( 4 ) |

12. Over the past 2 weeks, how often have you been nervous or anxious because of your illness?

|               |                   |               |         |       |
|---------------|-------------------|---------------|---------|-------|
| all the time, | most of the time, | now and then, | rarely, | never |
| ( 0 )         | ( 1 )             | ( 2 )         | ( 3 )   | ( 4 ) |

13. Over the past 2 weeks, how often have you been satisfied with your life in general?

|               |                      |                  |         |       |
|---------------|----------------------|------------------|---------|-------|
| all the time, | most of the<br>time, | now and<br>then, | rarely, | never |
| ( 4 )         | ( 3 )                | ( 2 )            | ( 1 )   | ( 0 ) |

14. Over the past 2 weeks, how often have you felt frustrated about your illness?

|               |                      |                  |         |       |
|---------------|----------------------|------------------|---------|-------|
| all the time, | most of the<br>time, | now and<br>then, | rarely, | never |
| ( 0 )         | ( 1 )                | ( 2 )            | ( 3 )   | ( 4 ) |

15. Over the past 2 weeks, how often have you felt tired or weary?

|               |                      |                  |         |       |
|---------------|----------------------|------------------|---------|-------|
| all the time, | most of the<br>time, | now and<br>then, | rarely, | never |
| ( 0 )         | ( 1 )                | ( 2 )            | ( 3 )   | ( 4 ) |

16. Over the past 2 weeks, how often have you felt unwell?

|               |                      |                  |         |       |
|---------------|----------------------|------------------|---------|-------|
| all the time, | most of the<br>time, | now and<br>then, | rarely, | never |
| ( 0 )         | ( 1 )                | ( 2 )            | ( 3 )   | ( 4 ) |

17. Over the past week (past 7 days), how many nights did you wake up at least once during the night?

|              |         |         |         |       |
|--------------|---------|---------|---------|-------|
| every night, | 5 to 6  | 3 to 4  | 1 to 2  | never |
|              | nights, | nights, | nights, |       |
| ( 0 )        | ( 1 )   | ( 2 )   | ( 3 )   | ( 4 ) |

18. To what extent has your illness led to disturbing changes in your appearance?

|            |       |           |           |            |
|------------|-------|-----------|-----------|------------|
| very much, | much, | somewhat, | a little, | not at all |
| ( 0 )      | ( 1 ) | ( 2 )     | ( 3 )     | ( 4 )      |

19. To what extent has your general physical strength deteriorated due to your illness?

|            |       |             |           |            |
|------------|-------|-------------|-----------|------------|
| very much, | much, | moderately, | a little, | not at all |
| ( 0 )      | ( 1 ) | ( 2 )       | ( 3 )     | ( 4 )      |

20. To what extent have you lost your stamina due to your illness?

|            |       |             |           |            |
|------------|-------|-------------|-----------|------------|
| very much, | much, | moderately, | a little, | not at all |
| ( 0 )      | ( 1 ) | ( 2 )       | ( 3 )     | ( 4 )      |

21. To what extent have you lost your fitness due to your illness?

|            |       |             |           |            |
|------------|-------|-------------|-----------|------------|
| very much, | much, | moderately, | a little, | not at all |
| ( 0 )      | ( 1 ) | ( 2 )       | ( 3 )     | ( 4 )      |

22. Over the past two weeks, have you been able to continue your normal daily activities (such as work, school, and household tasks)?

|               |                      |                  |         |       |
|---------------|----------------------|------------------|---------|-------|
| all the time, | most of the<br>time, | now and<br>then, | rarely, | never |
| ( 4 )         | ( 3 )                | ( 2 )            | ( 1 )   | ( 0 ) |

23. Over the past 2 weeks, have you been able to continue your normal recreational activities (such as sports and hobbies)?

|               |                      |                  |         |       |
|---------------|----------------------|------------------|---------|-------|
| all the time, | most of the<br>time, | now and<br>then, | rarely, | never |
| ( 4 )         | ( 3 )                | ( 2 )            | ( 1 )   | ( 0 ) |

24. Over the past 2 weeks, have you felt very restricted by the medical treatment?

|               |                      |                  |         |       |
|---------------|----------------------|------------------|---------|-------|
| all the time, | most of the<br>time, | now and<br>then, | rarely, | never |
| ( 0 )         | ( 1 )                | ( 2 )            | ( 3 )   | ( 4 ) |

25. To what extent have your relationships with people close to you changed due to your illness?

|            |       |             |           |            |
|------------|-------|-------------|-----------|------------|
| very much, | much, | moderately, | a little, | not at all |
| ( 0 )      | ( 1 ) | ( 2 )       | ( 3 )     | ( 4 )      |

26. To what extent has your sex life been impaired by your illness?

|            |       |             |           |            |
|------------|-------|-------------|-----------|------------|
| very much, | much, | moderately, | a little, | not at all |
| ( 0 )      | ( 1 ) | ( 2 )       | ( 3 )     | ( 4 )      |

27. Over the past 2 weeks, have you been bothered by regurgitation of fluid or food?

|               |                      |                  |         |       |
|---------------|----------------------|------------------|---------|-------|
| all the time, | most of the<br>time, | now and<br>then, | rarely, | never |
| ( 0 )         | ( 1 )                | ( 2 )            | ( 3 )   | ( 4 ) |

28. Over the past 2 weeks, how often have you felt bothered by your slow eating?

|               |                      |                  |         |       |
|---------------|----------------------|------------------|---------|-------|
| all the time, | most of the<br>time, | now and<br>then, | rarely, | never |
| ( 0 )         | ( 1 )                | ( 2 )            | ( 3 )   | ( 4 ) |

29. Over the past 2 weeks, how often have you felt bothered by difficulty swallowing your food?

|               |                      |                  |         |       |
|---------------|----------------------|------------------|---------|-------|
| all the time, | most of the<br>time, | now and<br>then, | rarely, | never |
| ( 0 )         | ( 1 )                | ( 2 )            | ( 3 )   | ( 4 ) |

30. Over the past two weeks, how often have you been bothered by urgent bowel movements?

|               |                      |                  |         |       |
|---------------|----------------------|------------------|---------|-------|
| all the time, | most of the<br>time, | now and<br>then, | rarely, | never |
| ( 0 )         | ( 1 )                | ( 2 )            | ( 3 )   | ( 4 ) |

31. Over the past 2 weeks, how often have you been bothered by diarrhoea?

|               |                      |                  |         |       |
|---------------|----------------------|------------------|---------|-------|
| all the time, | most of the<br>time, | now and<br>then, | rarely, | never |
| ( 0 )         | ( 1 )                | ( 2 )            | ( 3 )   | ( 4 ) |

32. Over the past 2 weeks, how often have you been bothered by constipation?

|               |                      |                  |         |       |
|---------------|----------------------|------------------|---------|-------|
| all the time, | most of the<br>time, | now and<br>then, | rarely, | never |
| ( 0 )         | ( 1 )                | ( 2 )            | ( 3 )   | ( 4 ) |



33. Over the past 2 weeks, how often have you been bothered by nausea?

|               |                      |                  |         |       |
|---------------|----------------------|------------------|---------|-------|
| all the time, | most of the<br>time, | now and<br>then, | rarely, | never |
| ( 0 )         | ( 1 )                | ( 2 )            | ( 3 )   | ( 4 ) |

34. Over the past 2 weeks, how often have you been alarmed by blood in your stool?

|               |                      |                  |         |       |
|---------------|----------------------|------------------|---------|-------|
| all the time, | most of the<br>time, | now and<br>then, | rarely, | never |
| ( 0 )         | ( 1 )                | ( 2 )            | ( 3 )   | ( 4 ) |

35. Over the past 2 weeks, how often have you been bothered by heartburn?

|               |                      |                  |         |       |
|---------------|----------------------|------------------|---------|-------|
| all the time, | most of the<br>time, | now and<br>then, | rarely, | never |
| ( 0 )         | ( 1 )                | ( 2 )            | ( 3 )   | ( 4 ) |

36. Over the past 2 weeks, how often have you been bothered by involuntary bowel movements?

|               |                      |                  |         |       |
|---------------|----------------------|------------------|---------|-------|
| all the time, | most of the<br>time, | now and<br>then, | rarely, | never |
| ( 0 )         | ( 1 )                | ( 2 )            | ( 3 )   | ( 4 ) |

## Appendix 2: Study Flow Diagram

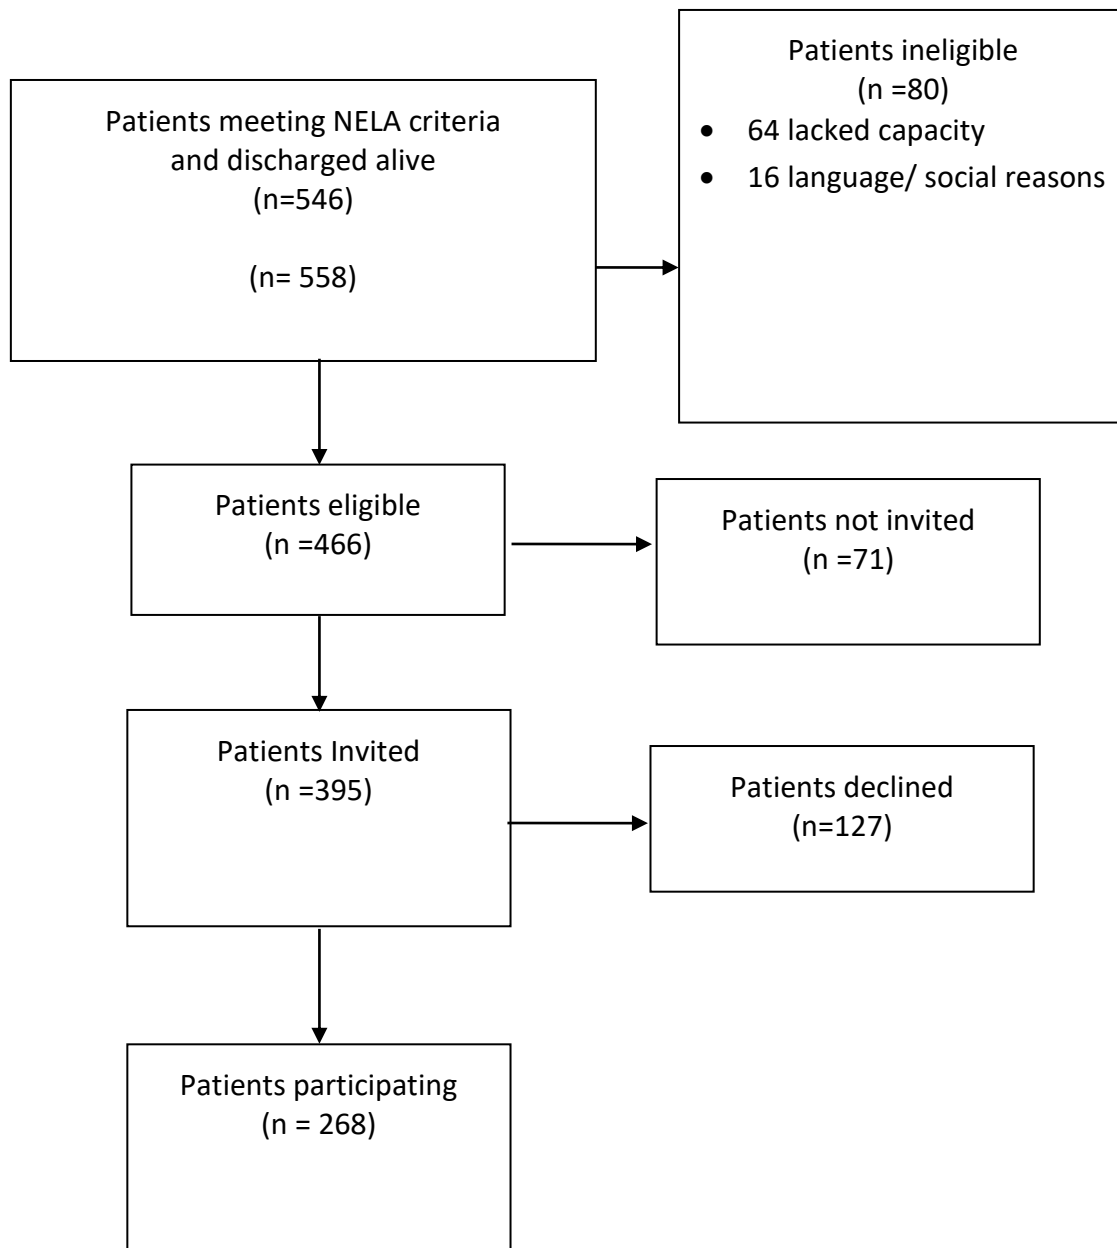

Supplement: bmjgast-2018-000238supp001.pdf [file bmjgast-2018-000238supp001.pdf]
